# Supplementary material for: Occurrence and Removal of Triazine Herbicides during Wastewater Treatment Processes and Their Environmental Impact on Aquatic Life
Source: MDPI journal article supplement (doi:10.3390/ijerph19084557), 2022-04-10
Supplement: s1 [file s1]

# Supplementary Material

## **Occurrence and removal of triazine herbicides during wastewater treatment processes and their environmental impact on aquatic life**

Meng Wang<sup>1</sup>, Jiapei Lv<sup>2</sup>, Haowei Deng<sup>1</sup>, Qiong Liu<sup>1</sup>, Shuxuan Liang<sup>1,\*</sup>

<sup>1</sup> Key Laboratory of Analytical Science and Technology of Hebei Province,  
College of Chemistry and Environmental Science, Hebei University, Baoding 071002,  
China;

<sup>2</sup> State Key Laboratory of Environmental Criteria and Risk Assessment,  
Chinese Research Academy of Environmental Sciences, Beijing 100012, China

\* Correspondence: liangsx168@126.com

## **Figure captions**

**Figure S1.** Removal of herbicides in the municipal wastewater treatment plant.

**Figure S2.** WCSI values of the herbicides in the WWTP effluent.

## **Table legends**

**Table S1.** Characteristics of wastewater in different units (n=3).

**Table S2.** Comparison of the individual herbicide concentrations in wastewater.

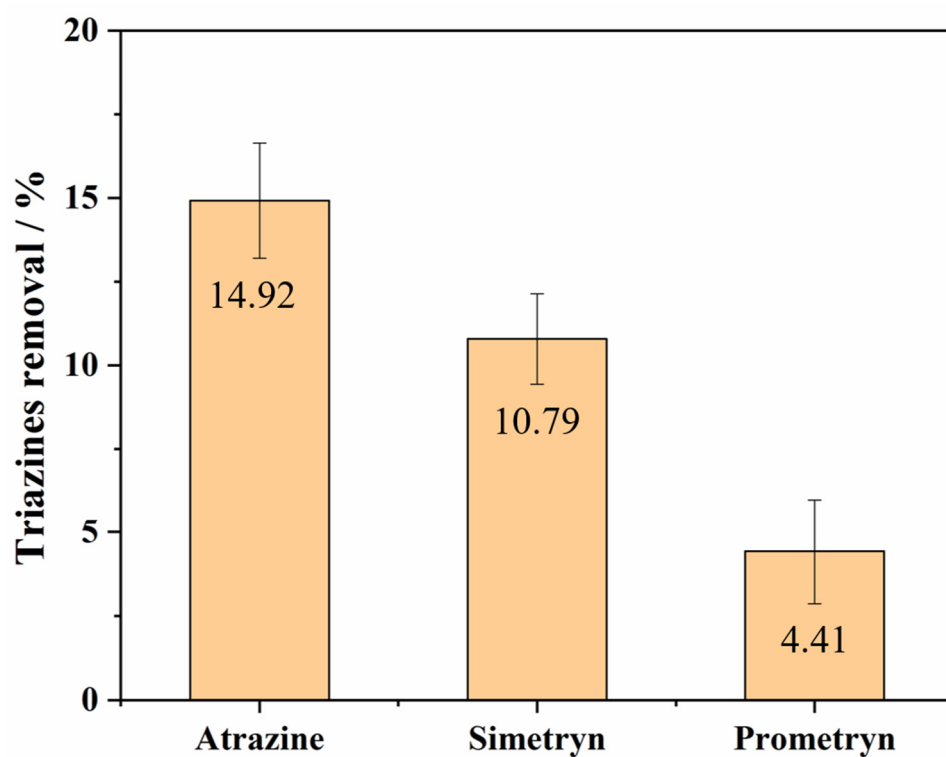

**Fig. S1.** Removal of herbicides in the municipal wastewater treatment plant.

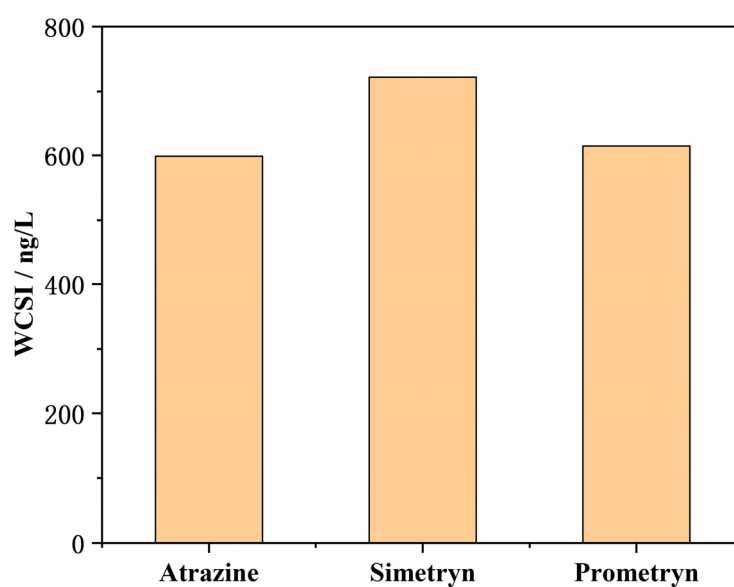

**Fig. S2.** WCSI values of the herbicides in the WWTP effluent.

**Table S1.** Characteristics of wastewater in different units (n=3).

| Parameter  | Influent    | Primary sedimentation tank | End aeration  | Secondary sedimentation tank | Effluent   |
|------------|-------------|----------------------------|---------------|------------------------------|------------|
| SS (mg/L)  | 353.67±3.21 | 283.00±11.79               | 3656.67±30.55 | 4.10±0.2                     | 3.33±0.15  |
| COD (mg/L) | 232.97±0.97 | 121.13±2.58                | 36.93±0.70    | 32.61±1.19                   | 31.63±1.15 |
| TN (mg/L)  | 46.77±1.62  | 45.59±2.28                 | 6.89±0.03     | 7.07±0.23                    | 6.52±0.11  |
| TP (mg/L)  | 6.17±0.35   | 5.60±0.33                  | 0.35±0.02     | 0.26±0.02                    | 0.23±0.03  |
| T (°C)     | 28.57±0.06  | 28.47±0.06                 | 28.63±0.06    | 28.57±0.06                   | 28.27±0.06 |

**Table S2.** Comparison of the individual herbicide concentrations in wastewater.

| Herbicides    | Concentration (ng/L) |                     |                     |              |
|---------------|----------------------|---------------------|---------------------|--------------|
|               | 2010 <sup>(a)</sup>  | 2011 <sup>(a)</sup> | 2013 <sup>(b)</sup> | This study   |
| Atrazine      | 3.90-27.44           | 7.20-36.90          | 1.23-7.4            | 89.43-121.97 |
| Propazine     | 6.74-277.40          | 1.53-5.70           | ND                  | ND           |
| Simazine      | 5.00                 | 4.55-37.79          | 1.61-12.5           | ND           |
| Simetryn      | ND                   | ND                  | ND                  | 77.83-102.77 |
| Terbutylazine | ND                   | 2.15-35.54          | 8.8-10.3            | ND           |
| Terbutryn     | 5.00-182.87          | 0.82-73.46          | ND                  | ND           |
| Prometryn     | ND                   | ND                  | ND                  | 27.32-30.76  |

a-(Campo et al., 2013); b-(Köck-Schulmeyer et al., 2013); ND-not detected.
